# Supplementary material for: Estimating the local false discovery rate via a bootstrap solution to the reference class problem
Source: PubMed Central journal article supplement (PMC6261018; doi:10.1371/journal.pone.0206902), 2018-11-26
Supplement: pone.0206902.s001.pdf [file pone.0206902.s001.pdf]

## Appendix

The proof of Theorem proceeds by a series of lemmas.

**Lemma 1** *If the random indicator  $A_i$  that is conditional on  $X_i = x_i$  is Bernoulli( $1 - \pi_0(x_i)$ ), then  $E(\Psi(z_i; x_i)|X_i = x_i) = \pi_0(x_i)$ .*

**Proof 1** *We have*

$$E(A_i|Z_i = z_i, X_i = x_i) = P(A_i = 1|Z_i = z_i, X_i = x_i) = 1 - \Psi(z_i; x_i).$$

*By taking the expectation with respect to the density of  $Z_i$  that is conditional on  $X_i = x_i$ , we obtain*

$$\begin{aligned} E(E(A_i|Z_i = z_i, X_i = x_i)|X_i = x_i) &= E(1 - \Psi(z_i; x_i)|X_i = x_i), \\ E(A_i|X_i = x_i) &= 1 - E(\Psi(z_i; x_i)|X_i = x_i), \end{aligned}$$

*and the result follows.*

**Lemma 2** *For  $x_i \in \mathcal{R}_1(x_0, \Delta_0)$ , the bootstrap estimator  $\hat{\mu}(\Delta_0, B)$  is a weakly consistent estimator of  $\pi_{01}$ . That is,*

$$\lim_{N \rightarrow \infty} \lim_{B \rightarrow \infty} P(|\hat{\mu}(\Delta_0, B) - \pi_{01}| > \epsilon | X_i = x_i) = 0 \text{ for any } \epsilon > 0.$$

**Proof 2** *By Markov's inequality, it holds for any  $\epsilon > 0$  that*

$$\begin{aligned} P(|\hat{\mu}(\Delta_0, B) - \pi_{01}| > \epsilon | X_i = x_i) &\leq \frac{E[|\hat{\mu}(\Delta_0, B) - \pi_{01}| | X_i = x_i]}{\epsilon} \\ &\leq \frac{E[|\hat{\mu}(\Delta_0, B) - \mu_{\Delta_0}(x_i)| | X_i = x_i]}{\epsilon} \\ &\quad + \frac{E[|\mu_{\Delta_0}(x_i) - \pi_{01}| | X_i = x_i]}{\epsilon}. \end{aligned}$$

$\hat{\mu}(\Delta_0, B)$  *is an unbiased estimator of  $\mu_{\Delta_0}(x_i)$ , and has zero variance as  $B$  becomes large. That is,*

$$\lim_{B \rightarrow \infty} E[(\hat{\mu}(\Delta_0, B) - \mu_{\Delta_0}(x_i))^2 | X_i = x_i] = \lim_{B \rightarrow \infty} \frac{\sigma_{\Delta_0}^2(x_i)}{B} = 0. \quad (1)$$

*Hence,*

$$\lim_{B \rightarrow \infty} E[|\hat{\mu}(\Delta_0, B) - \mu_{\Delta_0}(x_i)| | X_i = x_i] \leq \lim_{B \rightarrow \infty} E[(\hat{\mu}(\Delta_0, B) - \mu_{\Delta_0}(x_i))^2 | X_i = x_i]^{\frac{1}{2}} = 0.$$

*On the other hand, when  $x_i \in \mathcal{R}_1(x_0, \Delta_0)$  the expected dimension of the reference class  $\mathbf{z}_i^{\Delta_0}$  as  $N$  becomes large is  $\lim_{N \rightarrow \infty} d_i^{\Delta_0} = \infty$ . By applying the consistency assumption of  $\hat{\Psi}_i$  on the reference class  $\mathbf{z}_i^{\Delta_0}$ , we have that*

$$\lim_{N \rightarrow \infty} P(|\hat{\Psi}_i(\mathbf{z}_i^{\Delta_0}) - \Psi(z_i; x_i)| > \epsilon | X_i = x_i) = 0.$$

*Because  $|\hat{\Psi}_i(\mathbf{z}_i^{\Delta_0}) - \Psi(z_i; x_i)| \leq 1$ , the dominated convergence Theorem implies that*

$$\lim_{N \rightarrow \infty} E[\hat{\Psi}_i(\mathbf{z}_i^{\Delta_0}) - \Psi(z_i; x_i) | X_i = x_i] = 0.$$

For  $x_i \in \mathcal{R}_1(x_0, \Delta_0)$ ,  $E(\Psi(z_i; x_i)|X_i = x_i) = \pi_{01}$  and

$$\lim_{N \rightarrow \infty} \frac{E[|\mu_{\Delta_0}(x_i) - \pi_{01}| | X_i = x_i]}{\epsilon} = 0.$$

**Lemma 3** If  $x_i \in \mathcal{R}_1(x_0, \Delta_0)$ , then the bootstrap estimator  $\widehat{\mathcal{B}}(\Delta, \Delta_0, B)$  is a weakly consistent estimator of the prediction bias  $\mathcal{B}_\Delta(x_i)$ . That is,

$$\lim_{N \rightarrow \infty} \lim_{B \rightarrow \infty} P(|\widehat{\mathcal{B}}(\Delta, \Delta_0, B) - \mathcal{B}_\Delta(x_i)| > \epsilon | X_i = x_i) = 0 \text{ for any } \epsilon > 0.$$

**Proof 3** By Markov's inequality, we have for any  $\epsilon > 0$  that

$$\begin{aligned} P(|\widehat{\mathcal{B}}(\Delta, \Delta_0, B) - \mathcal{B}_\Delta(x_i)| > \epsilon | X_i = x_i) &\leq \frac{E[|\widehat{\mathcal{B}}(\Delta, \Delta_0, B) - \mathcal{B}_\Delta(x_i)| | X_i = x_i]}{\epsilon} \\ &\leq \frac{E[|\widehat{\mu}(\Delta, B) - \mu_\Delta(x_i)| | X_i = x_i]}{\epsilon} \\ &\quad + \frac{E[|\widehat{\mu}(\Delta_0, B) - \pi_{01}| | X_i = x_i]}{\epsilon}. \end{aligned}$$

Because  $\widehat{\mu}(\Delta, B)$  is an unbiased estimator of  $\mu_\Delta(x_i)$  whose variance is asymptotically zero, the result follows from Lemma 2 and the fact that

$$\lim_{B \rightarrow \infty} E[|\widehat{\mu}(\Delta, B) - \mu_\Delta(x_i)| | X_i = x_i] \leq \lim_{B \rightarrow \infty} E[(\widehat{\mu}(\Delta, B) - \mu_\Delta(x_i))^2 | X_i = x_i]^{\frac{1}{2}} = 0.$$

**Lemma 4** For  $x_i \in \mathcal{R}_1(x_0, \Delta_0)$ , the bootstrap estimator  $\widehat{\Delta}_{0i}^*$  is a weakly consistent estimator of  $\Delta_{0i}^*$ . That is,

$$\lim_{N \rightarrow \infty} \lim_{B \rightarrow \infty} P(|\widehat{\Delta}_{0i}^* - \Delta_{0i}^*| > \epsilon | X_i = x_i) = 0 \text{ for any } \epsilon > 0.$$

**Proof 4** The bootstrap sample variance is a weakly consistent estimator of the variance of  $\widehat{\Psi}_i(z_i^\Delta)$  and it follows from Lemma 3, that

$$\lim_{N \rightarrow \infty} \lim_{B \rightarrow \infty} P(|\widehat{err}(\Delta, \Delta_0, B) - err(\widehat{\Psi}(z_i^\Delta) | X_i = x_i)| > \epsilon | X_i = x_i) = 0.$$

Therefore, the result follows from the continuous mapping Theorem and the fact that

$$\lim_{N \rightarrow \infty} \lim_{B \rightarrow \infty} P(|\arg \inf_{\Delta \geq \Delta_0} \widehat{err}(\Delta, \Delta_0, B) - \arg \inf_{\Delta \geq \Delta_0} err(\widehat{\Psi}(z_i^\Delta) | X_i = x_i)| > \epsilon | X_i = x_i) = 0.$$

## Proof of Theorem:

**Proof 5** We know that

$$MSE(\widehat{\Psi}_i(\mathbf{z}_i^{\widehat{\Delta}_{0i}^*})|\mathcal{R}_1(x_0, \Delta_0)) = \int_{\mathcal{R}_1(x_0, \Delta_0)} MSE(\widehat{\Psi}_i(\mathbf{z}_i^{\widehat{\Delta}_{0i}^*})|X_i = x_i) dP_{x_i},$$

$$MSE(\widehat{\Psi}_i(\mathbf{z})|\mathcal{R}_1(x_0, \Delta_0)) = \int_{\mathcal{R}_1(x_0, \Delta_0)} MSE(\widehat{\Psi}_i(\mathbf{z})|X_i = x_i) dP_{x_i}.$$

It suffices to show that

$$\lim_{N \rightarrow \infty} \lim_{B \rightarrow \infty} \left[ MSE(\widehat{\Psi}_i(\mathbf{z}_i^{\widehat{\Delta}_{0i}^*})|X_i = x_i) - MSE(\widehat{\Psi}_i(\mathbf{z})|X_i = x_i) \right] \leq 0.$$

$$\begin{aligned} MSE(\widehat{\Psi}_i(\mathbf{z}_i^{\widehat{\Delta}_{0i}^*})|X_i = x_i) - MSE(\widehat{\Psi}_i(\mathbf{z})|X_i = x_i) &= err(\widehat{\Psi}_i(\mathbf{z}_i^{\widehat{\Delta}_{0i}^*})|X_i = x_i) \\ &\quad - err(\widehat{\Psi}_i(\mathbf{z}_i^{\Delta_{0i}^*})|X_i = x_i) \\ &\quad + err(\widehat{\Psi}_i(\mathbf{z}_i^{\Delta_{0i}^*})|X_i = x_i) \\ &\quad - err(\widehat{\Psi}_i(\mathbf{z})|X_i = x_i). \end{aligned}$$

From Lemma 4, the weak consistency of  $\widehat{\Delta}_{0i}^*$  implies that

$$\lim_{N \rightarrow \infty} \lim_{B \rightarrow \infty} err(\widehat{\Psi}_i(\mathbf{z}_i^{\widehat{\Delta}_{0i}^*})|X_i = x_i) - err(\widehat{\Psi}_i(\mathbf{z}_i^{\Delta_{0i}^*})|X_i = x_i) = 0.$$

On the other hand, because  $\Delta_{0i}^*$  is optimal tuning parameter, it follows that

$$err(\widehat{\Psi}_i(\mathbf{z}_i^{\Delta_{0i}^*})|X_i = x_i) - err(\widehat{\Psi}_i(\mathbf{z})|X_i = x_i) \leq err(\widehat{\Psi}_i(\mathbf{z}_i^{\Delta})|X_i = x_i) - err(\widehat{\Psi}_i(\mathbf{z})|X_i = x_i)$$

for any  $\Delta \in [\Delta_0, \infty)$ , which indicates that

$$\begin{aligned} \lim_{N \rightarrow \infty} \lim_{B \rightarrow \infty} \left[ MSE(\widehat{\Psi}_i(\mathbf{z}_i^{\widehat{\Delta}_{0i}^*})|X_i = x_i) - MSE(\widehat{\Psi}_i(\mathbf{z})|X_i = x_i) \right] \\ \leq \lim_{N \rightarrow \infty} \lim_{B \rightarrow \infty} \left[ err(\widehat{\Psi}_i(\mathbf{z}_i^{\Delta})|X_i = x_i) - err(\widehat{\Psi}_i(\mathbf{z})|X_i = x_i) \right] \\ = \lim_{N \rightarrow \infty} \lim_{B \rightarrow \infty} \left[ MSE(\widehat{\Psi}_i(\mathbf{z}_i^{\Delta})|X_i = x_i) - MSE(\widehat{\Psi}_i(\mathbf{z})|X_i = x_i) \right] = 0. \end{aligned}$$

The facts that both  $\lim_{N \rightarrow \infty} MSE(\widehat{\Psi}_i(\mathbf{z})|X_i = x_i) = 0$  and

$\lim_{N \rightarrow \infty} MSE(\widehat{\Psi}_i(\mathbf{z}_i^{\Delta})|X_i = x_i) = 0$  follow from the consistency and the dominated convergence Theorem.
